# Supplementary material for: Accessing social media: Help or hindrance for people with social anxiety?
Source: PubMed Central journal article supplement (PMC7086304; doi:10.1177/2043808719837811), 2019-04-04
Supplement: Supplementary_materials_(1).pdf [file Supplementary_materials_%281%29.pdf]

## Supplementary materials

### Facebook Safety Behaviours Checklist

Please tick if this behaviour has occurred in the past 10 minutes of Facebook use

|                                                                                      |  |
|--------------------------------------------------------------------------------------|--|
| Repeatedly edited or retyped what you posted                                         |  |
| Carefully selected the words or content you added                                    |  |
| Made an effort to get what you said right                                            |  |
| Planned what to put on the site in advance                                           |  |
| Mentally stored something to add to Facebook at a later point                        |  |
| Exaggerated something to appear better to others                                     |  |
| Increased your privacy settings                                                      |  |
| Censored photographs (e.g. by untagging or 'hiding from timeline')                   |  |
| Avoided posting a status update                                                      |  |
| Compared your profile to others                                                      |  |
| Tried not to attract attention                                                       |  |
| Checked back over posts you added                                                    |  |
| Made an effort to come across well                                                   |  |
| Avoided adding anything to Facebook                                                  |  |
| Tried to picture how you appear to others                                            |  |
| Tried not to add anything too personal                                               |  |
| Avoided going online to Facebook chat                                                |  |
| Checked that you were coming across well                                             |  |
| Tried to act normal                                                                  |  |
| Checked words or information you had used were accurate (e.g. Google or spell check) |  |
| Used interesting photographs taken purposefully for Facebook                         |  |
| Limited information about your likes and dislikes                                    |  |
| Went over something you had posted on Facebook in your mind afterwards               |  |
| Censored what you added to Facebook                                                  |  |
| Made a special effort to appear witty, intelligent or interesting                    |  |
| Monitored how others responded to your posts                                         |  |
| Thought of something to post or comment but deciding not to do so                    |  |
| Turned off Facebook chat to all or some friends                                      |  |
| Filtered who could see some posts                                                    |  |

### **Facebook Cognitions Checklist**

**Please tick if the thought has crossed your mind in the past 10 minutes of Facebook use**

|                                                  |  |
|--------------------------------------------------|--|
| I am unlikeable                                  |  |
| People can tell I am nervous                     |  |
| I am foolish                                     |  |
| People will reject me                            |  |
| I am inadequate                                  |  |
| I am equal to others                             |  |
| I don't have as many friends as others           |  |
| I am unable to write properly                    |  |
| People are not interested in me                  |  |
| I'm coming across badly                          |  |
| I will make a mistake                            |  |
| I come across well                               |  |
| People won't like me                             |  |
| People are interested in me                      |  |
| I am vulnerable                                  |  |
| People on Facebook are watching me               |  |
| I am weird or different                          |  |
| People will judge me negatively                  |  |
| I am acceptable to others                        |  |
| When compared to other people I come off worse   |  |
| People think I am boring                         |  |
| I write inappropriate things                     |  |
| I write stupid things                            |  |
| People enjoy what I add on Facebook              |  |
| My life is boring compared to others             |  |
| People like what I put on Facebook               |  |
| No one will like what I do/add                   |  |
| People know I have been looking at their profile |  |
| People will unfriend me                          |  |
| Other:                                           |  |
